# Supplementary material for: Ewing sarcoma gene EWS is essential for meiosis and B lymphocyte development
Source: JCI journal article supplement (doi:10.1172/jci31222), 2007-04-09
Supplement: sd1 [file 1]

**A**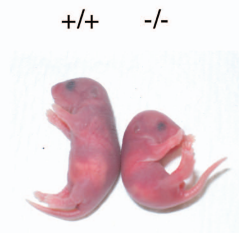**B**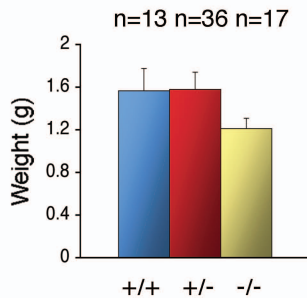**C**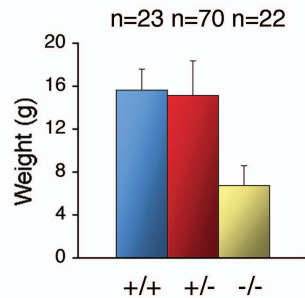

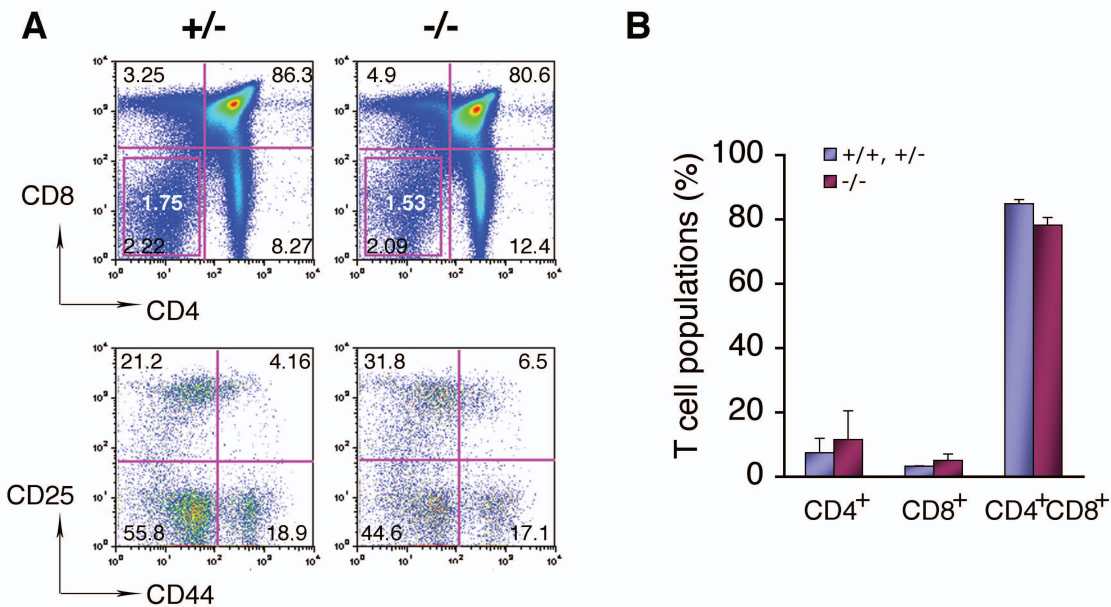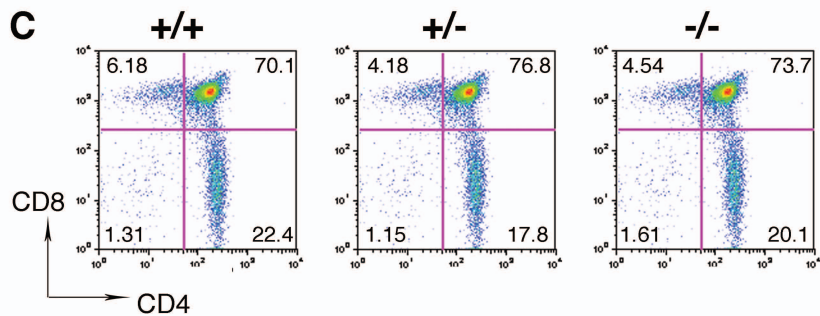

**D**

Absolute number of donor-derived T cells ( $\times 10^6$ )

|                                   | +/-, +/- (n=6)    | -/- (n=4)         |
|-----------------------------------|-------------------|-------------------|
| CD4 <sup>+</sup>                  | 18.09 $\pm$ 3.44  | 18.32 $\pm$ 6.19  |
| CD8 <sup>+</sup>                  | 4.61 $\pm$ 0.92   | 3.98 $\pm$ 1.32   |
| CD4 <sup>+</sup> CD8 <sup>+</sup> | 65.74 $\pm$ 25.19 | 51.11 $\pm$ 31.15 |

**Supplement Figure 2**

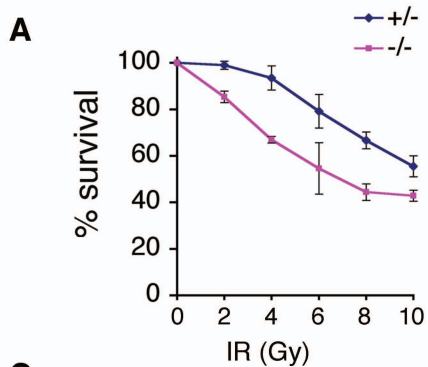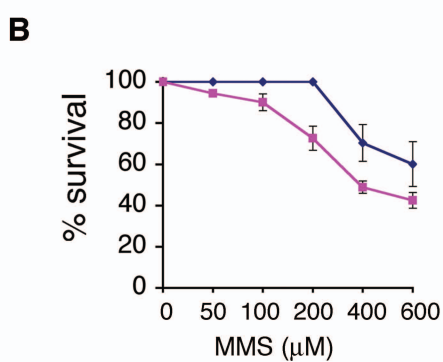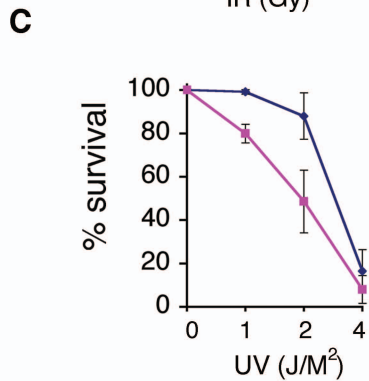

**Supplement Figure S3**

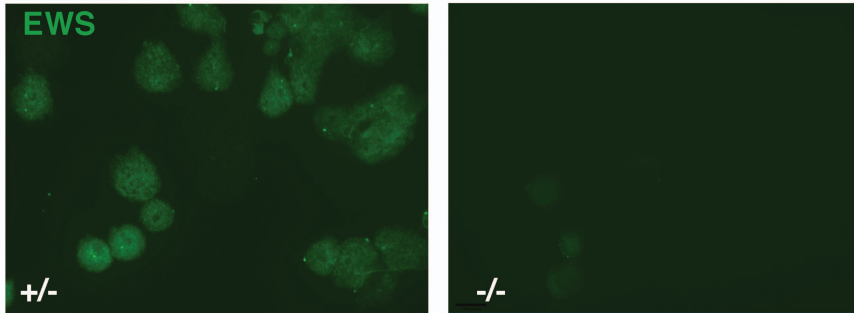

**Supplement Figure S4**

**Supplement Figure 1.** *Ews*<sup>-/-</sup> mice die postnatally and show growth retardation.

(A) Photograph of postnatal day 0.5 (P0.5) wildtype and *Ews*<sup>-/-</sup> littermate pups. (B) Body weight measurement of *Ews*<sup>+/+</sup>, *Ews*<sup>+/-</sup>, and *Ews*<sup>-/-</sup> littermates at P0.5. (C) Body weight measurement of *Ews*<sup>+/+</sup>, *Ews*<sup>+/-</sup>, and *Ews*<sup>-/-</sup> littermates at P21.

**Supplement Figure 2.** Analysis of T cell development in *Ews*<sup>-/-</sup> mice.

(A) Thymocytes from 3-week-old *Ews*<sup>-/-</sup> and littermate controls were stained for CD4, CD8, CD25 and CD44. Analysis of CD4 and CD8 is shown on the top panel. Gating on the CD4<sup>+</sup>CD8<sup>+</sup> population, the proportion of CD25<sup>+</sup>CD44<sup>+</sup> (DN1), CD25<sup>+</sup>CD44<sup>+</sup> (DN2), CD25<sup>+</sup>CD44<sup>+</sup> (DN3) and CD25<sup>+</sup>CD44<sup>+</sup> (DN4) cells is depicted on the bottom. (B) Percentage of CD4<sup>+</sup>, CD8<sup>+</sup> and CD4<sup>+</sup>CD8<sup>+</sup> cells (n=3 for controls and *Ews*<sup>-/-</sup>). (C-D) Fetal liver chimera analysis. (C) Donor-derived thymocytes were stained for CD4 and CD8 and analyzed by flow cytometry. Representative data are presented from four separate experiments analyzing four *Ews*<sup>-/-</sup> and six control recipients. (D) Absolute number of donor-derived CD4<sup>+</sup>, CD8<sup>+</sup> and CD4<sup>+</sup>CD8<sup>+</sup> T cells are shown.

**Supplement Figure 3.** Hypersensitivity of *Ews*<sup>-/-</sup> MEFs to DNA damage.

Litter-matched *Ews*<sup>+/+</sup> and *Ews*<sup>-/-</sup> MEFs were subjected to various doses of IR (A), UV (B) and methyl methanesulfonate (MMS) (C) as indicated, and cell viability was determined 1 week after the treatment. Results are an average of 3 independent cell lines per genotype performed in duplicate.

**Supplement Figure 4.** Immunofluorescent microscopy of EWS in spermatocytes.

Spermatocyte spreads of *Ews*<sup>+/+</sup> and *Ews*<sup>-/-</sup> spermatocytes were stained with affinity-purified antibody against EWS, followed by FITC-labeled secondary antibody.
